# Supplementary material for: A maple syrup extract alters lipid metabolism in obese type 2 diabetic model mice
Source: Nutr Metab (Lond). 2019 Dec 4;16:84. doi: 10.1186/s12986-019-0403-2 (PMC6894227; doi:10.1186/s12986-019-0403-2)
Supplement: Supplementary file 4 — Additional file 4. GO terms and annotated DEGs in WAT. Up and down represent DEGs that were up- and downregulated, respectively, in mice fed MSx compared to the levels in controls. Fold change was calculated from the expression value of each probe normalized by the Affymetrix Micro Array Suite 5.0 method. [file 12986_2019_403_MOESM4_ESM.xlsx]

## Sheet: Sheet1
Additional file 4. GO terms and annotated DEGs in WAT.
GO term		Number of genes		Affymetrix ID	Ensembl ID	Gene symbol	Gene name	Gene expression direction vs. control group	Fold change
GO:0006955 Immune response		33		1425247_a_at	ENSMUSG00000076614	abParts; Igh; Ighg1; Ighm; Ighg; Igh-VJ558; Igha	Parts of antibodies, mostly variable regions.; SubName: Full=Igh protein;; immunoglobulin heavy constant gamma 1 (G1m marker); immunoglobulin heavy constant mu; Immunoglobulin heavy chain (gamma polypeptide); immunoglobulin heavy chain (J558 family); immunoglobulin heavy constant alpha	Down	0.744081
				1427756_x_at	−				0.620655
				1427870_x_at					0.913695
				1425324_x_at					0.595881
				1451632_a_at					0.707625
				1421653_a_at	ENSMUSG00000095079				0.843205
				1429381_x_at	ENSMUSG00000095079				0.988327
				1425763_x_at	ENSMUSG00000095079				0.491692
				1428018_a_at	ENSMUSG00000044811; OTTMUSG00000003604	AF251705	cDNA sequence AF251705	Down	0.589926
				1450381_a_at	ENSMUSG00000022508; OTTMUSG00000027148	Bcl6	B cell leukemia/lymphoma 6	Down	0.944948
				1421818_at					0.871626
				1417063_at	ENSMUSG00000036905; OTTMUSG00000009766	C1qb	complement component 1, q subcomponent, beta polypeptide	Down	0.612424
				1417789_at	ENSMUSG00000020676; OTTMUSG00000000860	Ccl11	chemokine (C-C motif) ligand 11	Up	1.50858
				1418126_at	ENSMUSG00000035042; OTTMUSG00000000992	Ccl5	chemokine (C-C motif) ligand 5	Up	1.02269
				1417266_at	ENSMUSG00000018927; OTTMUSG00000000995	Ccl6	chemokine (C-C motif) ligand 6	Down	0.55025
				1421228_at	ENSMUSG00000035373; OTTMUSG00000000856	Ccl7	chemokine (C-C motif) ligand 7	Up	0.87435
				1419684_at	ENSMUSG00000009185; OTTMUSG00000000929	Ccl8	chemokine (C-C motif) ligand 8	Down	1.01316
				1421186_at	ENSMUSG00000049103; OTTMUSG00000035281	Ccr2	chemokine (C-C motif) receptor 2	Up	0.926541
				1424727_at	ENSMUSG00000079227; OTTMUSG00000035282	Ccr5	chemokine (C-C motif) receptor 5	Down	0.806951
				1422259_a_at					0.694592
				1420804_s_at	ENSMUSG00000030144	Clec4d	C-type lectin domain family 4, member d	Down	0.670332
				1417574_at	ENSMUSG00000061353; OTTMUSG00000022768	Cxcl12	chemokine (C-X-C motif) ligand 12	Up	0.989591
				1417851_at	ENSMUSG00000023078	Cxcl13	chemokine (C-X-C motif) ligand 13	Up	0.684441
				1455242_at	ENSMUSG00000030067; OTTMUSG00000022717	Foxp1	forkhead box P1	Up	1.01478
				1453851_a_at	ENSMUSG00000021453; OTTMUSG00000023076	Gadd45g	growth arrest and DNA-damage-inducible 45 gamma	Down	0.737305
				1418392_a_at	ENSMUSG00000028268; OTTMUSG00000023133	Gbp3	guanylate binding protein 3	Up	0.469655
				1434380_at	ENSMUSG00000040253	Gbp7	guanylate binding protein 7	Up	0.734135
				1425156_at					0.794168
				1443783_x_at	ENSMUSG00000036594; OTTMUSG00000037121	H2-Aa	histocompatibility 2, class II antigen A, alpha	Up	0.336502
				1425137_a_at	ENSMUSG00000067235; OTTMUSG00000037234	H2-Q10	histocompatibility 2, Q region locus 10	Down	0.969554
				1431008_at	ENSMUSG00000073409; OTTMUSG00000037190	H2-Q6; H2-Q8; LOC68395; H2-Q7; H2-Q9	histocompatibility 2, Q region locus 6; histocompatibility 2, Q region locus 8; histocompatibility 2, Q region locus 6-like; histocompatibility 2, Q region locus 7; histocompatibility 2, Q region locus 9	Up	0.831798
				1418536_at	ENSMUSG00000060550; OTTMUSG00000037191				0.768104
				1424631_a_at	ENSMUSG00000076613	Ighg	Immunoglobulin heavy chain (gamma polypeptide)	Down	0.796476
				1426174_s_at					0.671426
				1424305_at	ENSMUSG00000067149; OTTMUSG00000036864	Igj	immunoglobulin joining chain	Down	0.884174
				1425145_at	ENSMUSG00000026069; OTTMUSG00000037806	Il1rl1	interleukin 1 receptor-like 1	Up	1.47921
				1451798_at	ENSMUSG00000026981; OTTMUSG00000011966	Il1rn	interleukin 1 receptor antagonist	Down	0.493652
				1423017_a_at					0.668271
				1425663_at					0.700704
				1426169_a_at	ENSMUSG00000040751	Lat2	linker for activation of T cells family, member 2	Down	1.25829
				1447520_at	ENSMUSG00000016024; OTTMUSG00000015936	Lbp	lipopolysaccharide binding protein	Down	0.702633
				1424302_at	ENSMUSG00000058818; OTTMUSG00000020499	Pirb	paired Ig-like receptor B	Down	0.687113
				1449824_at	ENSMUSG00000006014; OTTMUSG00000033522	Prg4	proteoglycan 4 (megakaryocyte stimulating factor, articular superficial zone protein)	Up	0.292687
				1429399_at	ENSMUSG00000033107	Rnf125	ring finger protein 125	Up	1.04533
				1449009_at	ENSMUSG00000078921; ENSMUSG00000078922; OTTMUSG00000005527; OTTMUSG00000005537	Tgtp1; Tgtp2	T cell specific GTPase 1; T cell specific GTPase 2	Up	0.450481
				1420909_at	ENSMUSG00000023951; OTTMUSG00000016285	Vegfa	vascular endothelial growth factor A	Up	1.12093
				1447845_s_at	ENSMUSG00000037440; OTTMUSG00000044612	Vnn1	vanin 1	Up	0.50477
				1418486_at					0.512269
GO:0006952 Defense response	−	31	−	1437811_x_at	−	Cotl1	coactosin-like 1 (Dictyostelium)	Up	0.998475
				1443783_x_at	ENSMUSG00000036594; OTTMUSG00000037121	H2-Aa	histocompatibility 2, class II antigen A, alpha	Up	0.336502
				1431008_at	ENSMUSG00000073409; OTTMUSG00000037190	H2-Q6; H2-Q8; LOC68395; H2-Q7; H2-Q9	histocompatibility 2, Q region locus 6; histocompatibility 2, Q region locus 8; histocompatibility 2, Q region locus 6-like; histocompatibility 2, Q region locus 7; histocompatibility 2, Q region locus 9	Up	0.831798
				1418536_at	ENSMUSG00000060550; OTTMUSG00000037191				0.768104
				1449455_at	ENSMUSG00000003283; OTTMUSG00000015777	Hck	hemopoietic cell kinase	Down	0.614514
				1417292_at	ENSMUSG00000078920; OTTMUSG00000005538	Ifi47	interferon gamma inducible protein 47	Up	0.903928
				1425145_at	ENSMUSG00000026069; OTTMUSG00000037806	Il1rl1	interleukin 1 receptor-like 1	Up	1.47921
				1417756_a_at	ENSMUSG00000018819; OTTMUSG00000018784	Lsp1	lymphocyte specific 1	Up	1.05616
	GO:0006954 Inflammatory response		24	1417063_at	ENSMUSG00000036905; OTTMUSG00000009766	C1qb	complement component 1, q subcomponent, beta polypeptide	Down	0.612424
				1417789_at	ENSMUSG00000020676; OTTMUSG00000000860	Ccl11	chemokine (C-C motif) ligand 11	Up	1.50858
				1418126_at	ENSMUSG00000035042; OTTMUSG00000000992	Ccl5	chemokine (C-C motif) ligand 5	Up	1.02269
				1421228_at	ENSMUSG00000035373; OTTMUSG00000000856	Ccl7	chemokine (C-C motif) ligand 7	Up	0.87435
				1419684_at	ENSMUSG00000009185; OTTMUSG00000000929	Ccl8	chemokine (C-C motif) ligand 8	Down	1.01316
				1421186_at	ENSMUSG00000049103; OTTMUSG00000035281	Ccr2	chemokine (C-C motif) receptor 2	Up	0.926541
				1424727_at	ENSMUSG00000079227; OTTMUSG00000035282	Ccr5	chemokine (C-C motif) receptor 5	Down	0.806951
				1422259_a_at					0.694592
				1419144_at	ENSMUSG00000008845	Cd163	CD163 antigen	Up	0.644395
				1448182_a_at	ENSMUSG00000047139	Cd24a	CD24a antigen	Down	0.663012
				1416034_at					0.65741
				1417851_at	ENSMUSG00000023078	Cxcl13	chemokine (C-X-C motif) ligand 13	Up	0.684441
				1448499_a_at	ENSMUSG00000022040	Ephx2	epoxide hydrolase 2, cytoplasmic	Down	1.07895
				1437308_s_at	ENSMUSG00000048376	F2r	coagulation factor II (thrombin) receptor	Up	1.07658
				1448183_a_at	ENSMUSG00000021109; OTTMUSG00000019740	Hif1a	hypoxia inducible factor 1, alpha subunit	Down	0.787263
				1424631_a_at	ENSMUSG00000076613	Ighg	Immunoglobulin heavy chain (gamma polypeptide)	Down	0.796476
				1426174_s_at					0.671426
				1450678_at	ENSMUSG00000000290; OTTMUSG00000019985	Itgb2	integrin beta 2	Down	0.545711
				1447520_at	ENSMUSG00000016024; OTTMUSG00000015936	Lbp	lipopolysaccharide binding protein	Down	0.702633
				1460436_at	ENSMUSG00000054008	Ndst1	N-deacetylase/N-sulfotransferase (heparan glucosaminyl) 1	Up	1.02161
				1430700_a_at	ENSMUSG00000023913; OTTMUSG00000026307	Pla2g7	phospholipase A2, group VII (platelet-activating factor acetylhydrolase, plasma)	Down	0.639913
				1450826_a_at	ENSMUSG00000040026	Saa3	serum amyloid A 3	Up	0.205427
				1451513_x_at	−	Serpina1b	serine (or cysteine) preptidase inhibitor, clade A, member 1B	Up	0.983611
				1418282_x_at	ENSMUSG00000071178; OTTMUSG00000035410	Serpina1b	serine (or cysteine) preptidase inhibitor, clade A, member 1B	Up	1.00188
				1425546_a_at	ENSMUSG00000032554; ENSMUSG00000090639; OTTMUSG00000024707; OTTMUSG00000035363	Srprb; Trf	signal recognition particle receptor, B subunit; transferrin	Up	0.973997
				1450377_at	ENSMUSG00000040152; OTTMUSG00000015240	Thbs1; Pald1	thrombospondin 1; phosphatase domain containing, paladin 1	Up	1.04274
				1460302_at					0.782603
				1421811_at					0.695239
				1447845_s_at	ENSMUSG00000037440; OTTMUSG00000044612	Vnn1	vanin 1	Up	0.50477
				1418486_at					0.512269
GO:0009611 Response to wounding		30		1417732_at	ENSMUSG00000021950; OTTMUSG00000027916	Anxa8	annexin A8	Up	1.27967
				1417063_at	ENSMUSG00000036905; OTTMUSG00000009766	C1qb	complement component 1, q subcomponent, beta polypeptide	Down	0.612424
				1417789_at	ENSMUSG00000020676; OTTMUSG00000000860	Ccl11	chemokine (C-C motif) ligand 11	Up	1.50858
				1418126_at	ENSMUSG00000035042; OTTMUSG00000000992	Ccl5	chemokine (C-C motif) ligand 5	Up	1.02269
				1421228_at	ENSMUSG00000035373; OTTMUSG00000000856	Ccl7	chemokine (C-C motif) ligand 7	Up	0.87435
				1419684_at	ENSMUSG00000009185; OTTMUSG00000000929	Ccl8	chemokine (C-C motif) ligand 8	Down	1.01316
				1421186_at	ENSMUSG00000049103; OTTMUSG00000035281	Ccr2	chemokine (C-C motif) receptor 2	Up	0.926541
				1424727_at	ENSMUSG00000079227; OTTMUSG00000035282	Ccr5	chemokine (C-C motif) receptor 5	Down	0.806951
				1422259_a_at					0.694592
				1419144_at	ENSMUSG00000008845	Cd163	CD163 antigen	Up	0.644395
				1448182_a_at	ENSMUSG00000047139	Cd24a	CD24a antigen	Down	0.663012
				1416034_at					0.65741
				1417851_at	ENSMUSG00000023078	Cxcl13	chemokine (C-X-C motif) ligand 13	Up	0.684441
				1448499_a_at	ENSMUSG00000022040	Ephx2	epoxide hydrolase 2, cytoplasmic	Down	1.07895
				1434920_a_at	ENSMUSG00000021262	Evl	Ena-vasodilator stimulated phosphoprotein	Down	0.479522
				1437308_s_at	ENSMUSG00000048376	F2r	coagulation factor II (thrombin) receptor	Up	1.07658
				1419321_at	ENSMUSG00000031443; OTTMUSG00000020609	F7	coagulation factor VII	Down	0.924021
				1415800_at	ENSMUSG00000050953	Gja1	gap junction protein, alpha 1	Up	0.953117
				1438650_x_at					1.08762
				1437992_x_at					0.985661
				1438945_x_at					1.02127
				1448183_a_at	ENSMUSG00000021109; OTTMUSG00000019740	Hif1a	hypoxia inducible factor 1, alpha subunit	Down	0.787263
				1416630_at	ENSMUSG00000007872; OTTMUSG00000009864	Id3	inhibitor of DNA binding 3	Down	0.768604
				1424631_a_at	ENSMUSG00000076613	Ighg	Immunoglobulin heavy chain (gamma polypeptide)	Down	0.796476
				1426174_s_at					0.671426
				1450678_at	ENSMUSG00000000290; OTTMUSG00000019985	Itgb2	integrin beta 2	Down	0.545711
				1447520_at	ENSMUSG00000016024; OTTMUSG00000015936	Lbp	lipopolysaccharide binding protein	Down	0.702633
				1460436_at	ENSMUSG00000054008	Ndst1	N-deacetylase/N-sulfotransferase (heparan glucosaminyl) 1	Up	1.02161
				1430700_a_at	ENSMUSG00000023913; OTTMUSG00000026307	Pla2g7	phospholipase A2, group VII (platelet-activating factor acetylhydrolase, plasma)	Down	0.639913
				1450826_a_at	ENSMUSG00000040026	Saa3	serum amyloid A 3	Up	0.205427
				1451513_x_at	−	Serpina1b	serine (or cysteine) preptidase inhibitor, clade A, member 1B	Up	0.983611
				1418282_x_at	ENSMUSG00000071178; OTTMUSG00000035410	Serpina1b	serine (or cysteine) preptidase inhibitor, clade A, member 1B	Up	1.00188
				1425546_a_at	ENSMUSG00000032554; ENSMUSG00000090639; OTTMUSG00000024707; OTTMUSG00000035363	Srprb; Trf	signal recognition particle receptor, B subunit; transferrin	Up	0.973997
				1418547_at	ENSMUSG00000029664; OTTMUSG00000042627	Tfpi2	tissue factor pathway inhibitor 2	Up	0.906039
				1450377_at	ENSMUSG00000040152; OTTMUSG00000015240	Thbs1; Pald1	thrombospondin 1; phosphatase domain containing, paladin 1	Up	1.04274
				1460302_at					0.782603
				1421811_at					0.695239
				1447845_s_at	ENSMUSG00000037440; OTTMUSG00000044612	Vnn1	vanin 1	Up	0.50477
				1418486_at					0.512269
GO:0042330 Taxis	GO:0006935 Chemotaxis	15		1454890_at	ENSMUSG00000041688; OTTMUSG00000018901	Amot	angiomotin	Up	0.887957
				1417789_at	ENSMUSG00000020676; OTTMUSG00000000860	Ccl11	chemokine (C-C motif) ligand 11	Up	1.50858
				1418126_at	ENSMUSG00000035042; OTTMUSG00000000992	Ccl5	chemokine (C-C motif) ligand 5	Up	1.02269
				1417266_at	ENSMUSG00000018927; OTTMUSG00000000995	Ccl6	chemokine (C-C motif) ligand 6	Down	0.55025
				1421228_at	ENSMUSG00000035373; OTTMUSG00000000856	Ccl7	chemokine (C-C motif) ligand 7	Up	0.87435
				1419684_at	ENSMUSG00000009185; OTTMUSG00000000929	Ccl8	chemokine (C-C motif) ligand 8	Down	1.01316
				1417574_at	ENSMUSG00000061353; OTTMUSG00000022768	Cxcl12	chemokine (C-X-C motif) ligand 12	Up	0.989591
				1417851_at	ENSMUSG00000023078	Cxcl13	chemokine (C-X-C motif) ligand 13	Up	0.684441
				1442340_x_at	ENSMUSG00000028195	Cyr61	cysteine rich protein 61	Up	1.3599
				1416039_x_at					1.20745
				1438133_a_at					1.24872
				1457823_at					1.2285
				1422412_x_at	−	Ear3	eosinophil-associated, ribonuclease A family, member 3	Up	0.457147
				1450678_at	ENSMUSG00000000290; OTTMUSG00000019985	Itgb2	integrin beta 2	Down	0.545711
				1447520_at	ENSMUSG00000016024; OTTMUSG00000015936	Lbp	lipopolysaccharide binding protein	Down	0.702633
				1417756_a_at	ENSMUSG00000018819; OTTMUSG00000018784	Lsp1	lymphocyte specific 1	Up	1.05616
				1419394_s_at	ENSMUSG00000056054	S100a8	S100 calcium binding protein A8 (calgranulin A)	Up	0.1604
				1448756_at	ENSMUSG00000056071; OTTMUSG00000026669	S100a9	S100 calcium binding protein A9 (calgranulin B)	Down	0.19692
GO:0010033 Response to organic substance		33		1433855_at	ENSMUSG00000057880; OTTMUSG00000025937	Abat	4-aminobutyrate aminotransferase	Up	1.09023
				1443225_at	ENSMUSG00000026834; OTTMUSG00000012673	Acvr1c	activin A receptor, type IC	Up	1.05639
				1416185_a_at	ENSMUSG00000028138; OTTMUSG00000029527	Adh5	alcohol dehydrogenase 5 (class III), chi polypeptide	Down	0.818501
				1425260_at	ENSMUSG00000029368	Alb	albumin	Up	0.964257
				1418126_at	ENSMUSG00000035042; OTTMUSG00000000992	Ccl5	chemokine (C-C motif) ligand 5	Up	1.02269
				1448182_a_at	ENSMUSG00000047139	Cd24a	CD24a antigen	Down	0.663012
				1416034_at					0.65741
				1442340_x_at	ENSMUSG00000028195	Cyr61	cysteine rich protein 61	Up	1.3599
				1416039_x_at					1.20745
				1438133_a_at					1.24872
				1457823_at					1.2285
				1449372_at	ENSMUSG00000022136	Dnajc3	DnaJ (Hsp40) homolog, subfamily C, member 3	Up	0.947619
				1417065_at	ENSMUSG00000038418; OTTMUSG00000021064	Egr1	early growth response 1	Up	2.83039
				1427682_a_at	ENSMUSG00000037868; OTTMUSG00000033571	Egr2	early growth response 2	Up	1.5322
				1427683_at					0.94316
				1437308_s_at	ENSMUSG00000048376	F2r	coagulation factor II (thrombin) receptor	Up	1.07658
				1425809_at	−	Fabp4	fatty acid binding protein 4, adipocyte	Up	0.782892
				1429169_at	ENSMUSG00000031167; OTTMUSG00000018091	Gm15453; Rbm3	predicted gene 15453; RNA binding motif protein 3	Down	1.10657
				1424815_at	ENSMUSG00000030244; OTTMUSG00000023569	Gys2	glycogen synthase 2	Down	1.13566
				1423858_a_at	ENSMUSG00000027875; OTTMUSG00000026370	Hmgcs2	3-hydroxy-3-methylglutaryl-Coenzyme A synthase 2	Up	1.02738
				1416630_at	ENSMUSG00000007872; OTTMUSG00000009864	Id3	inhibitor of DNA binding 3	Down	0.768604
				1436221_at	ENSMUSG00000040612; OTTMUSG00000021748	Ildr2	immunoglobulin-like domain containing receptor 2	Up	0.692356
				1447520_at	ENSMUSG00000016024; OTTMUSG00000015936	Lbp	lipopolysaccharide binding protein	Down	0.702633
				1438432_at	−	Lnpep	leucyl/cystinyl aminopeptidase	Up	0.93944
				1418288_at	ENSMUSG00000020593	Lpin1	lipin 1	Down	1.86947
				1428112_at	ENSMUSG00000032575; OTTMUSG00000032651	Manf	mesencephalic astrocyte-derived neurotrophic factor	Up	1.02047
				1438630_x_at	ENSMUSG00000053907	Mat2a	methionine adenosyltransferase II, alpha	Down	0.95596
				1423667_at					0.953744
				1438386_x_at					0.969061
				1433576_at					1.01201
				1456243_x_at	ENSMUSG00000038612	Mcl1	myeloid cell leukemia sequence 1	Down	0.913441
				1456381_x_at					0.893717
				1437527_x_at					0.911193
				1430307_a_at	ENSMUSG00000032418	Me1	malic enzyme 1, NADP(+)-dependent, cytosolic	Down	1.19397
				1423506_a_at	ENSMUSG00000067786; OTTMUSG00000016197	Nnat	neuronatin	Down	0.701533
				1438682_at	ENSMUSG00000041417	Pik3r1	phosphatidylinositol 3-kinase, regulatory subunit, polypeptide 1 (p85 alpha)	Up	0.908612
				1449182_at	ENSMUSG00000012705; OTTMUSG00000030662	Retn	resistin	Down	0.847933
				1451513_x_at	−	Serpina1b	serine (or cysteine) preptidase inhibitor, clade A, member 1B	Up	0.983611
				1418282_x_at	ENSMUSG00000071178; OTTMUSG00000035410	Serpina1b	serine (or cysteine) preptidase inhibitor, clade A, member 1B	Up	1.00188
				1421564_at	ENSMUSG00000066361; OTTMUSG00000027583	Serpina3c	serine (or cysteine) peptidase inhibitor, clade A, member 3C	Up	0.872255
				1423866_at	ENSMUSG00000058207; OTTMUSG00000035427	Serpina3k	serine (or cysteine) peptidase inhibitor, clade A, member 3K	Up	0.999152
				1450718_at	ENSMUSG00000005057	Sh2b2	SH2B adaptor protein 2	Down	0.888407
				1425546_a_at	ENSMUSG00000032554; ENSMUSG00000090639; OTTMUSG00000024707; OTTMUSG00000035363	Srprb; Trf	signal recognition particle receptor, B subunit; transferrin	Up	0.973997
